# Supplementary material for: Interfacial Synthesis of an Ultrathin Two-Dimensional Polymer Film via [2 + 2] Photocycloaddition
Source: MDPI journal article supplement (doi:10.3390/molecules28041930), 2023-02-17
Supplement: s1 [file s1]

# Supporting Information

## Interfacial Synthesis of an Ultrathin Two-Dimensional Polymer Film via [2 + 2] Photocycloaddition

Yanqi Ban <sup>1</sup>, Hui Wang <sup>2</sup>, Zixuan Xiao <sup>1</sup>, Lishui Sun <sup>1</sup>, Qingyan Pan <sup>1,\*</sup> and Yingjie Zhao <sup>1,\*</sup>

<sup>1</sup> Engineering Research Center of High Performance Polymer and Molding Technology, Ministry of Education, College of Polymer Science and Engineering, Qingdao University of Science and Technology, Qingdao 266042, China

<sup>2</sup> College of Chemical Engineering, Qingdao University of Science and Technology, Qingdao 266042, China

\* Correspondence: qingyanpan@qust.edu.cn (Q.P.); yz@qust.edu.cn (Y.Z.)

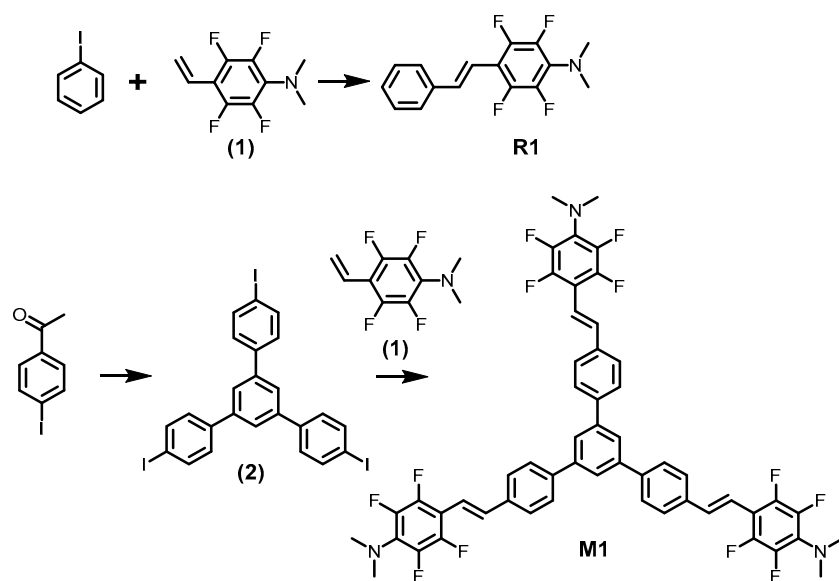

**Scheme S1.** Synthesis of molecules **R1** and **M1**.

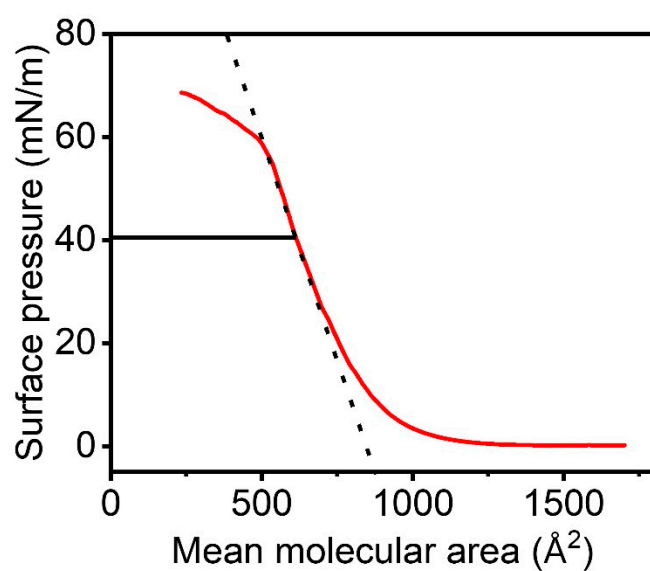

**Figure S1.** Surface pressure-mean molecular area (SP-MMA) isotherm of compressing **M1** with a compression rate of 3 mm/min.

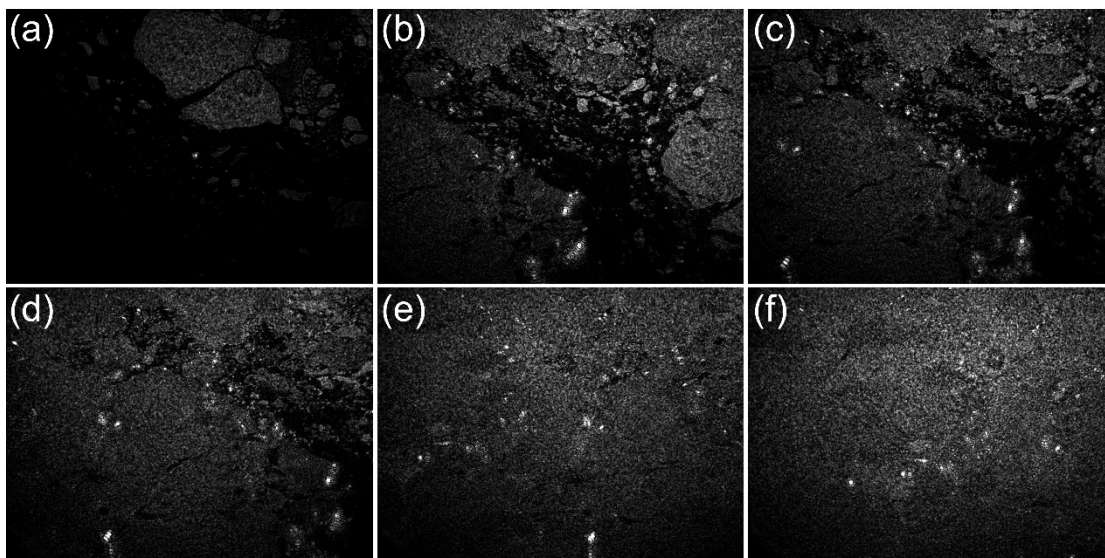

**Figure S2.** BAM images of the process of compressing **M1** in the SP-MMA isotherm study.

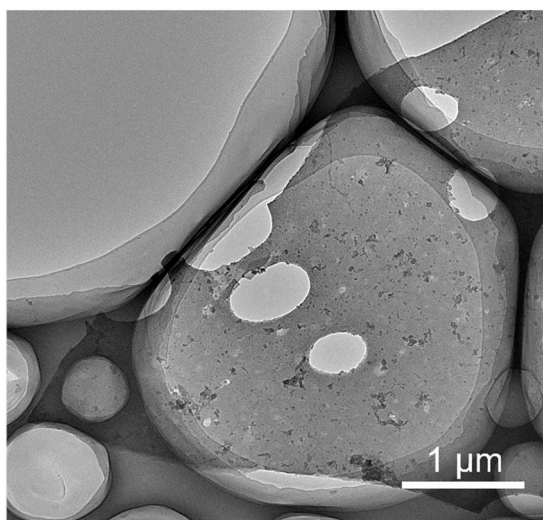

**Figure S3.** Free-standing **P1** film on a copper TEM grid.

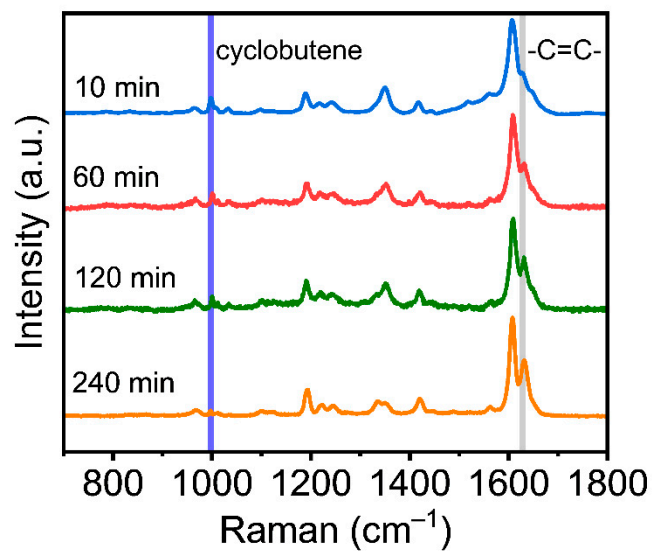

**Figure S4.** Raman spectrum of the depolymerization process of **P1**.

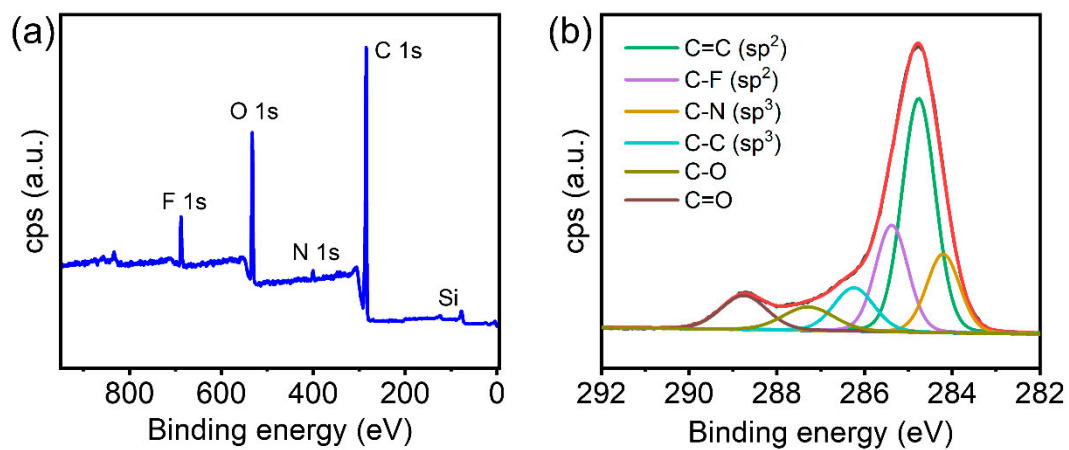

**Figure S5.** (a) XPS survey spectra of **P1** and (b) XPS C 1s spectra of **P1** on SiO<sub>2</sub>/Si wafer.

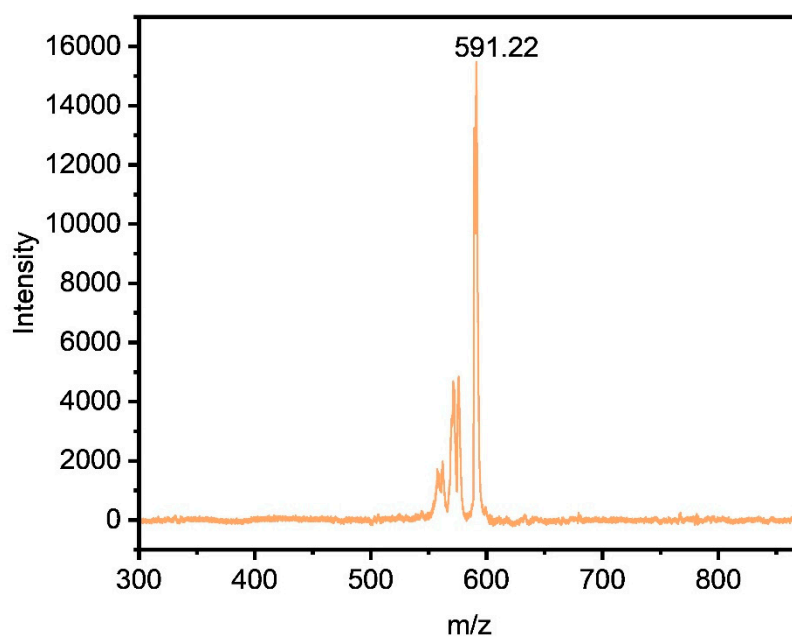

**Figure S6.** Mass spectrum of the compound **D1**.

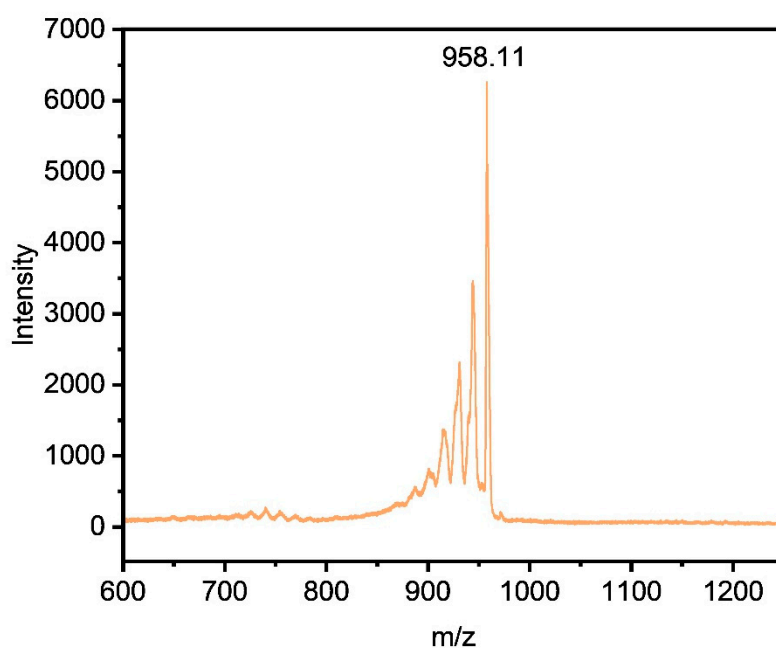

**Figure S7.** Mass spectrum of the compound **M1**.

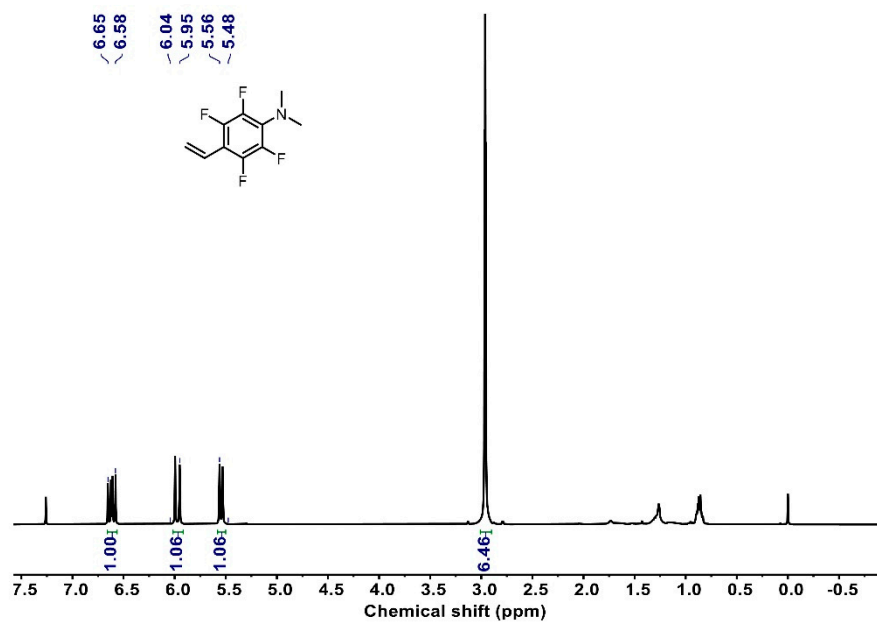

**Figure S8.** <sup>1</sup>H NMR spectrum of compound (1).

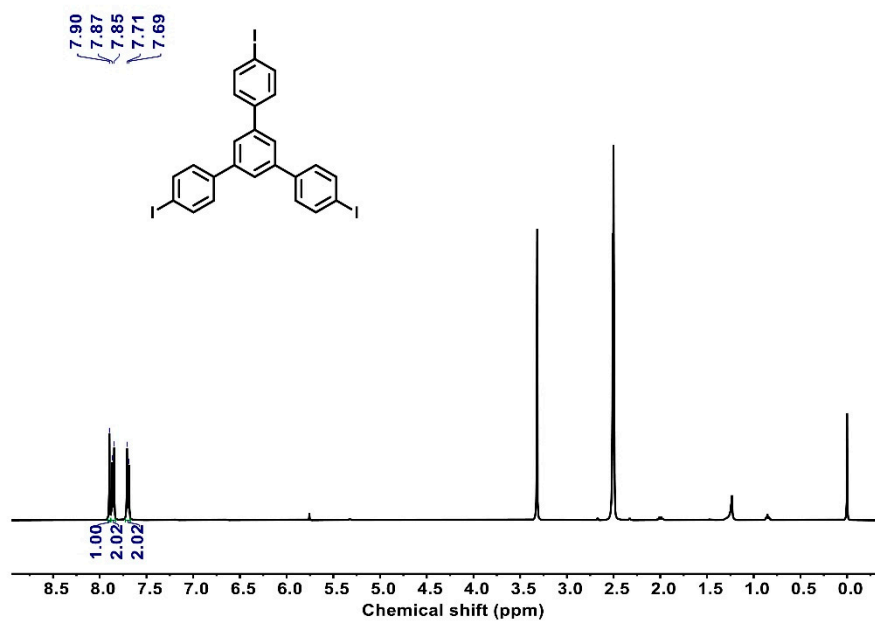

**Figure S9.** <sup>1</sup>H NMR spectrum of compound (2).

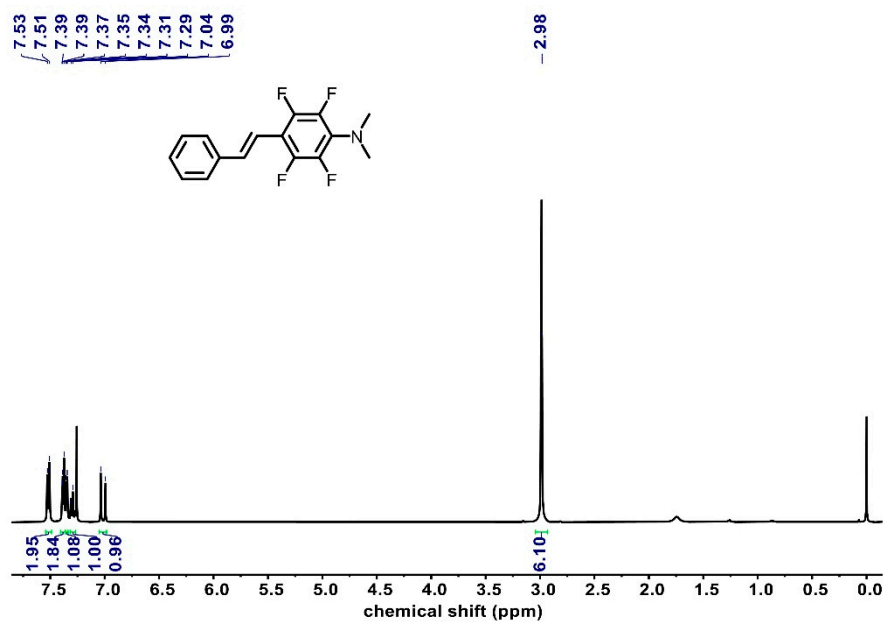

**Figure S10.** <sup>1</sup>H NMR spectrum of the compound **R1**.

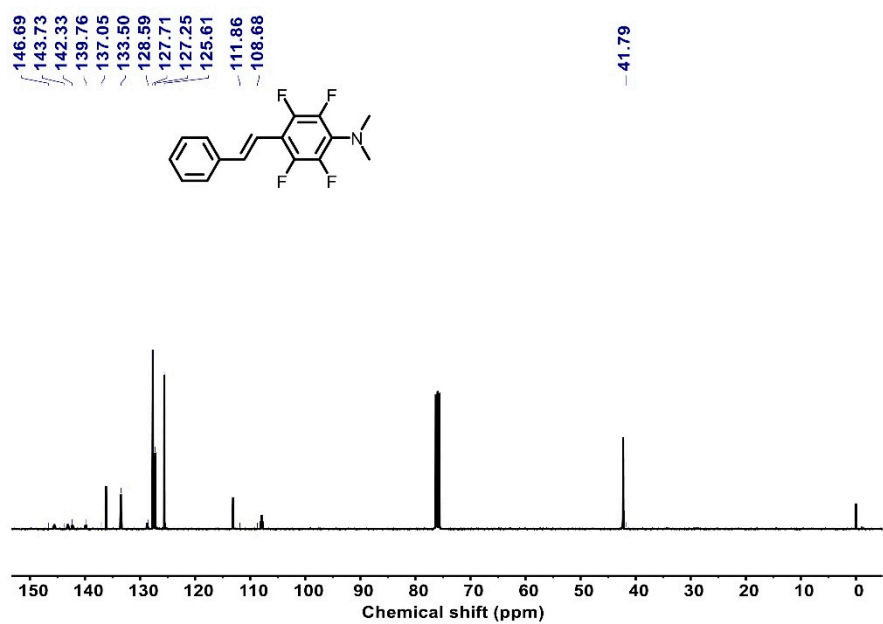

**Figure. S11.** <sup>13</sup>C NMR spectrum of the compound **R1**.

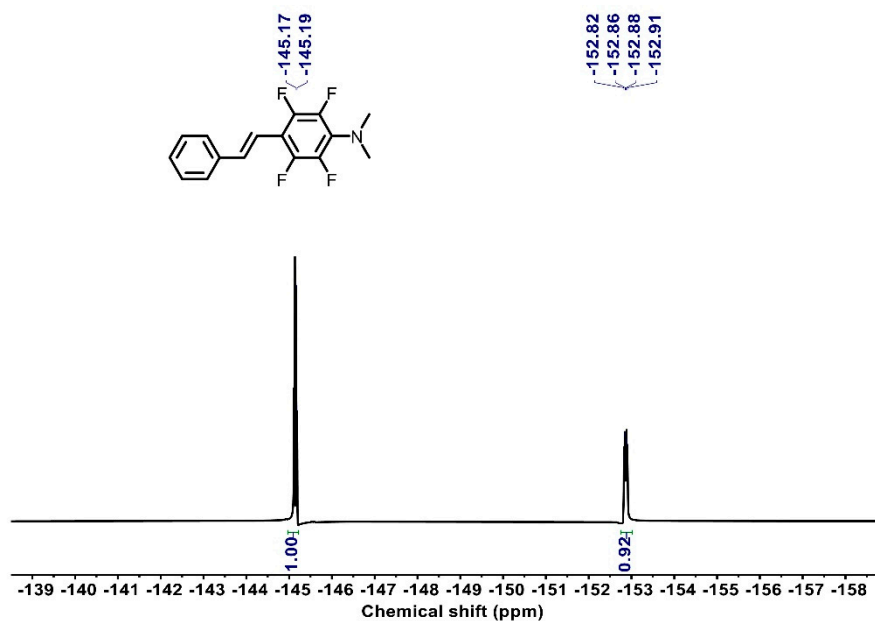

**Figure S12.**  $^{19}\text{F}$  NMR spectrum of the compound **R1**.

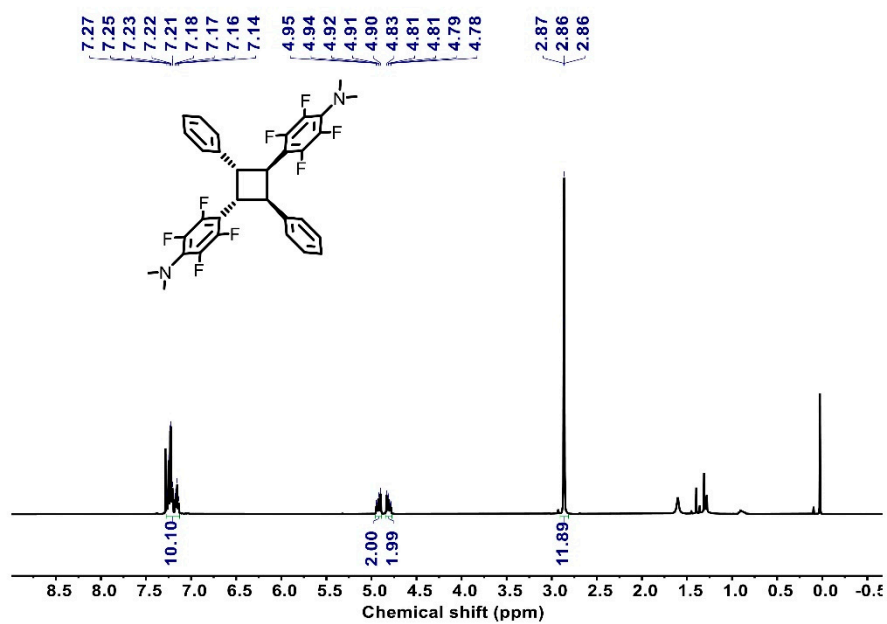

**Figure S13.**  $^1\text{H}$  NMR spectrum of the compound **D1**.



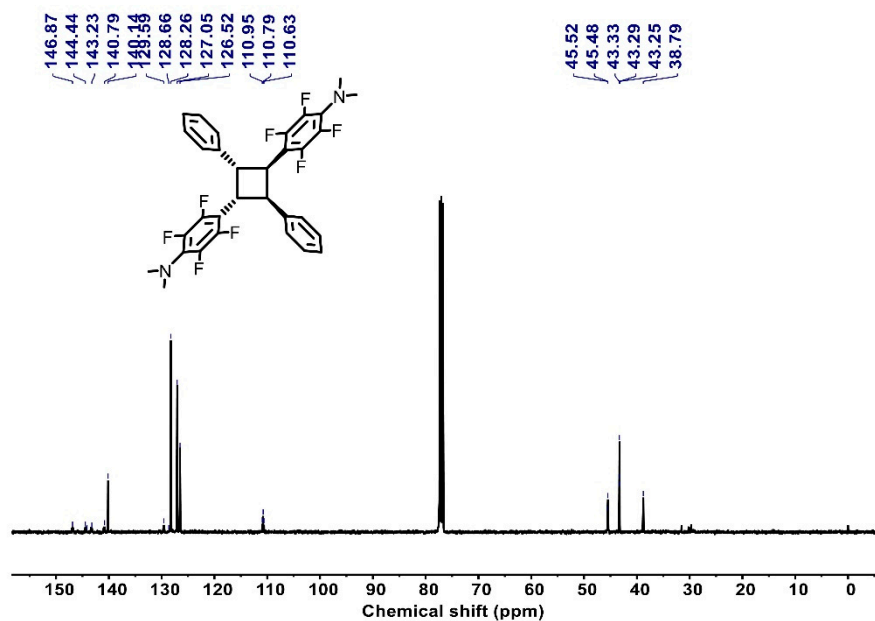

Figure S14. <sup>13</sup>C NMR spectrum of the compound D1.

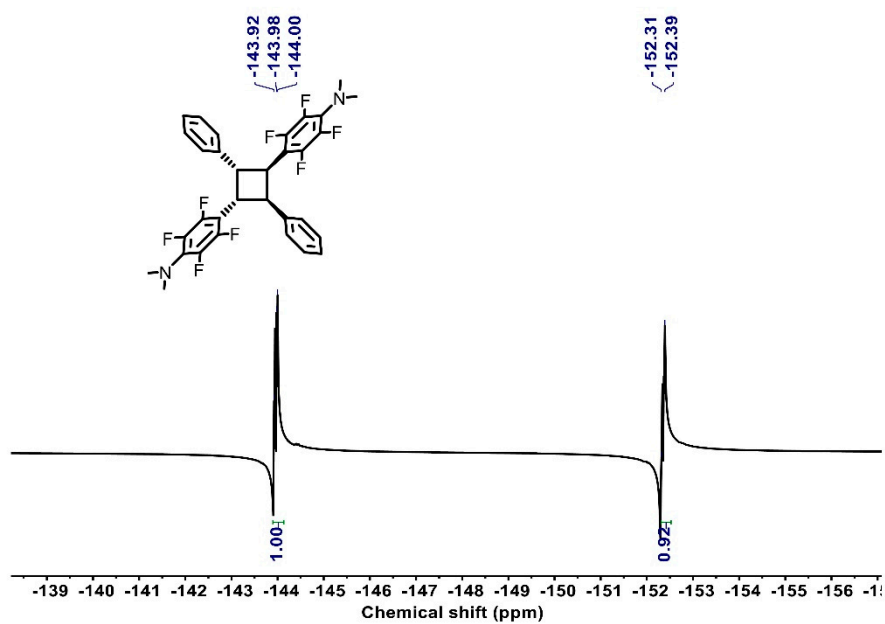

Figure S15. <sup>19</sup>F NMR spectrum of the compound R1.

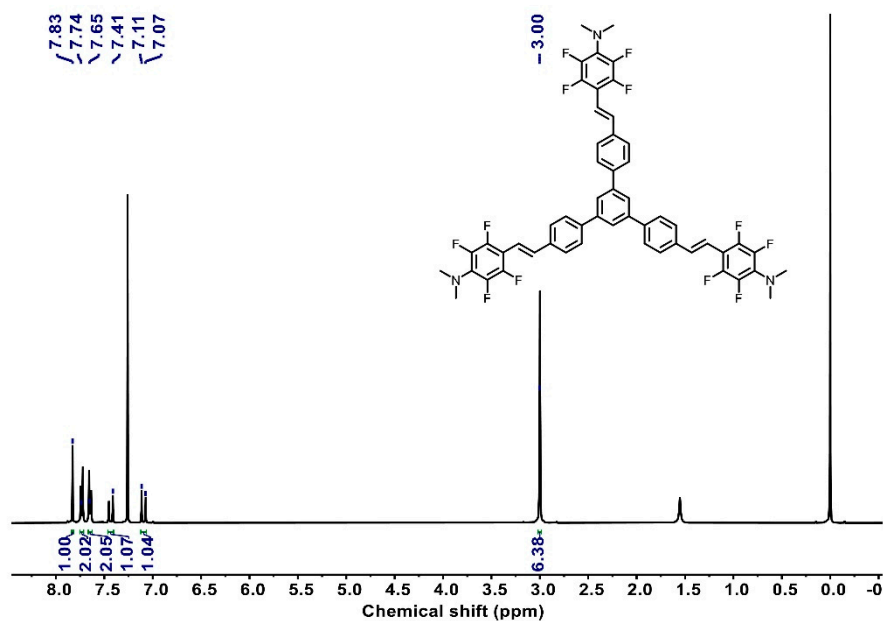

**Figure S16.** <sup>1</sup>H NMR spectrum of the compound **M1**.

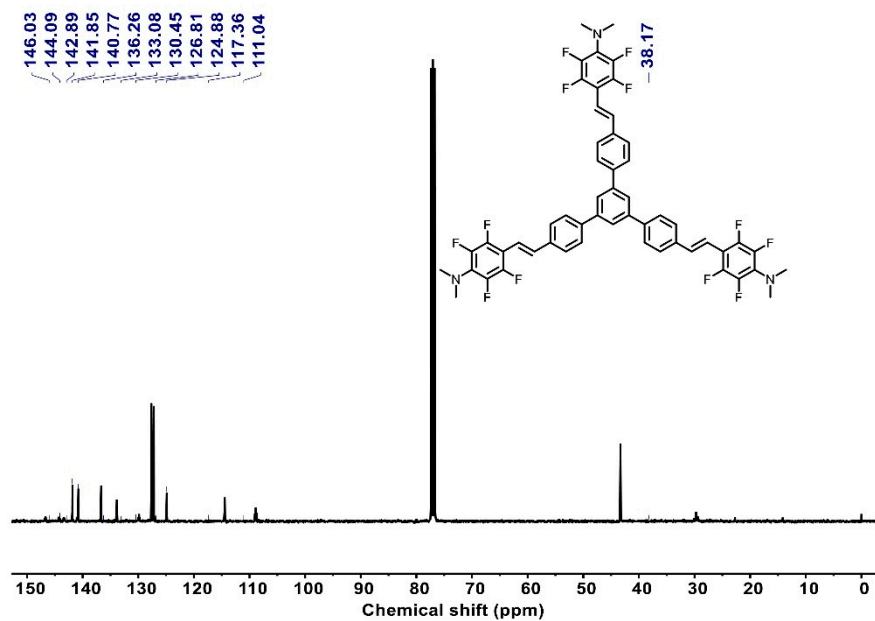

**Figure S17.** <sup>13</sup>C NMR spectrum of the compound **M1**.

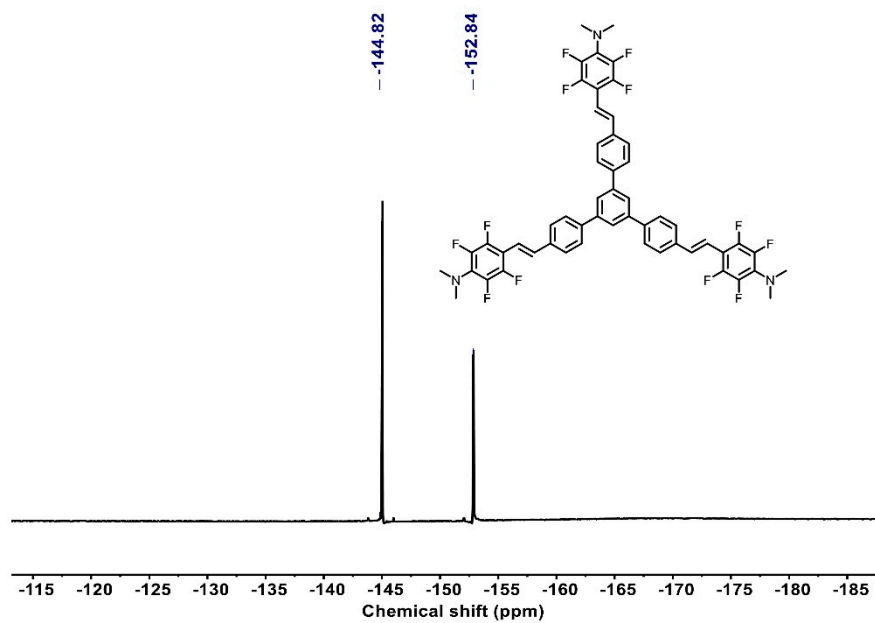

**Figure S18.**  $^{19}\text{F}$  NMR spectrum of the compound **M1**.

**Table S1:** The single crystal data of **R1**.

|                                             |                                                               |
|---------------------------------------------|---------------------------------------------------------------|
| Identification code                         | MX8069                                                        |
| CCDC number                                 | 2226830                                                       |
| Empirical formula                           | C <sub>16</sub> H <sub>13</sub> F <sub>4</sub> N              |
| Formula weight                              | 295.27                                                        |
| Temperature/K                               | 170.00(10)                                                    |
| Crystal system                              | monoclinic                                                    |
| Space group                                 | P2 <sub>1</sub> /c                                            |
| a/Å                                         | 10.4213(4)                                                    |
| b/Å                                         | 7.5800(3)                                                     |
| c/Å                                         | 17.4234(7)                                                    |
| $\alpha$ /°                                 | 90                                                            |
| $\beta$ /°                                  | 101.852(4)                                                    |
| $\gamma$ /°                                 | 90                                                            |
| Volume/Å <sup>3</sup>                       | 1346.99(9)                                                    |
| Z                                           | 4                                                             |
| $\rho$ <sub>calc</sub> /cm <sup>3</sup>     | 1.456                                                         |
| $\mu$ /mm <sup>-1</sup>                     | 0.124                                                         |
| F(000)                                      | 608.0                                                         |
| Crystal size/mm <sup>3</sup>                | 0.58 × 0.43 × 0.35                                            |
| Radiation                                   | Mo K $\alpha$ ( $\lambda$ = 0.71073)                          |
| 2 $\Theta$ range for data collection/       | 5.562 to 60.534                                               |
| Index ranges                                | -14 ≤ h ≤ 9, -7 ≤ k ≤ 10, -23 ≤ l ≤ 22                        |
| Reflections collected                       | 10583                                                         |
| Independent reflections                     | 3592 [R <sub>int</sub> = 0.0141, R <sub>sigma</sub> = 0.0154] |
| Data/restraints/parameters                  | 3592/0/211                                                    |
| Goodness-of-fit on F <sup>2</sup>           | 1.079                                                         |
| Final R indexes [I ≥ 2 $\sigma$ (I)]        | R <sub>1</sub> = 0.0682, wR <sub>2</sub> = 0.1801             |
| Final R indexes [all data]                  | R <sub>1</sub> = 0.0814, wR <sub>2</sub> = 0.1895             |
| Largest diff. peak/hole / e Å <sup>-3</sup> | 0.52/-0.82                                                    |
